# Supplementary material
Source: PubMed Central journal article supplement (PMC3423615)
Supplement: supp_en.2012-1119_en-12-1119_2t_2f_Supple_final.pdf [file supp_en.2012-1119_en-12-1119_2t_2f_Supple_final.pdf]

1 **Supplemental Data**

2 **Supplemental Table 1:** Sequences of primers used in hypothalamus gene expression analysis

| <b>Gene of Interest</b> | <b>Primer</b> | <b>Sequence (5'-3')</b>   |
|-------------------------|---------------|---------------------------|
| <i>Lepra</i>            | Sense         | CAGTCCCTCCCCTCTCCTAAGT    |
|                         | Antisense     | AGTCTCTAACCCCTTGCTTTTCATG |
| <i>Leprb</i>            | Sense         | GAGCCCTGAACCCATTTTCAGAAG  |
|                         | Antisense     | ACCATAGCTGCTGGGACCAT      |
| <i>Agrp<sup>1</sup></i> | Sense         | GGTGCTAGATCCACAGAACCG     |
|                         | Antisense     | CCAAGCAGGACTCGTGCCAG      |
| <i>Cart<sup>1</sup></i> | Sense         | TGGATGATGCGTCCCATGA       |
|                         | Antisense     | CGGAATGCGTTTACTCTTGAGC    |
| <i>Npy<sup>1</sup></i>  | Sense         | CGCTCTGCGAGACTACATCAA     |
|                         | Antisense     | GGGCTGGATCTCTTGCCAT       |
| <i>Pomc<sup>1</sup></i> | Sense         | CGAGGCCTTTCCCCTAGAGT      |
|                         | Antisense     | CCAGGACTTGCTCCAAGCC       |
| <i>Actb<sup>2</sup></i> | Sense         | GATGACCCAGATCATGTTTGAGACC |
|                         | Antisense     | AGATGGGCACAGTGTGGGTGA     |

3 <sup>1</sup> (Heijboer et al., 2005) <sup>2</sup> (Schroder et al., 2009)

4

5

6

7

8

9

10

11

12

13

14

15

16

17 **Supplemental Table 2:** Offspring behavior assessment. Activity is measured in centimeters traveled over  
 18 an hour and compared among groups within a trial. Anxiety is represented as less time (minutes: seconds)  
 19 spent in the center of the open field and was compared among groups within a trial.

| Behavior                | Males      |            |            | Females    |            |            |
|-------------------------|------------|------------|------------|------------|------------|------------|
|                         | Control    | Restricted | Leptin     | Control    | Restricted | Leptin     |
| <b>Activity (cm/hr)</b> |            |            |            |            |            |            |
| Trail 1                 | 174.4±13.7 | 204.6±19.8 | 216.5±12.6 | 204.5±13.2 | 208.7±11.8 | 204.5±13.4 |
| Trail 2                 | 170.0±20.8 | 202.7±21.1 | 220.0±14.4 | 216.2±17.4 | 187.9±10.8 | 203.7±16.6 |
| Trail 3                 | 178.4±23.2 | 233.8±15.7 | 203.4±14.0 | 204.9±9.6  | 190.6±15.6 | 180.7±15.7 |
| <b>Anxiety (mm:ss)</b>  |            |            |            |            |            |            |
| Trail 1                 | 16:29±1:17 | 15:30±1:49 | 16:46±1:09 | 16:35±1:43 | 16:09±2:15 | 16:56±1:06 |
| Trail 2                 | 12:20±0:57 | 11:19±1:46 | 14:39±1:28 | 12:15±1:05 | 12:25±0:39 | 10:57±1:17 |
| Trail 3                 | 12:26±1:31 | 12:59±0:48 | 14:32±1:35 | 12:30±1:01 | 12:15±2:02 | 10:38±0:53 |

20

21

22 **Supplemental Figure 1:** Examples of the classifications of NAFLD. A) Normal liver; grade 0. B) Mild  
 23 disease; grade <0-3. C) Moderate disease; grade >3-6.9. D) Severe disease; grade 7-9.

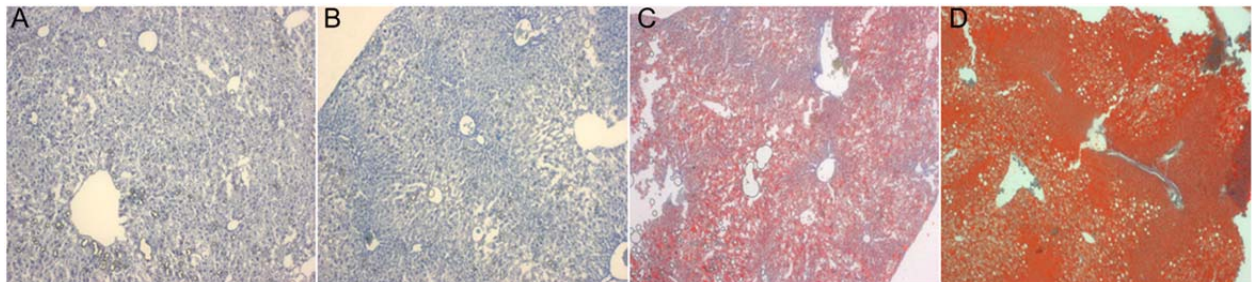

24

25

26

27

28

29

30

31

32 **Supplemental Figure 2:** Representative higher magnification images of NAFLD. A) Male control, B)  
33 Female control, C) Male restricted, D) Female restricted, E) Male restricted, leptin treated F) Female  
34 restricted, leptin treated

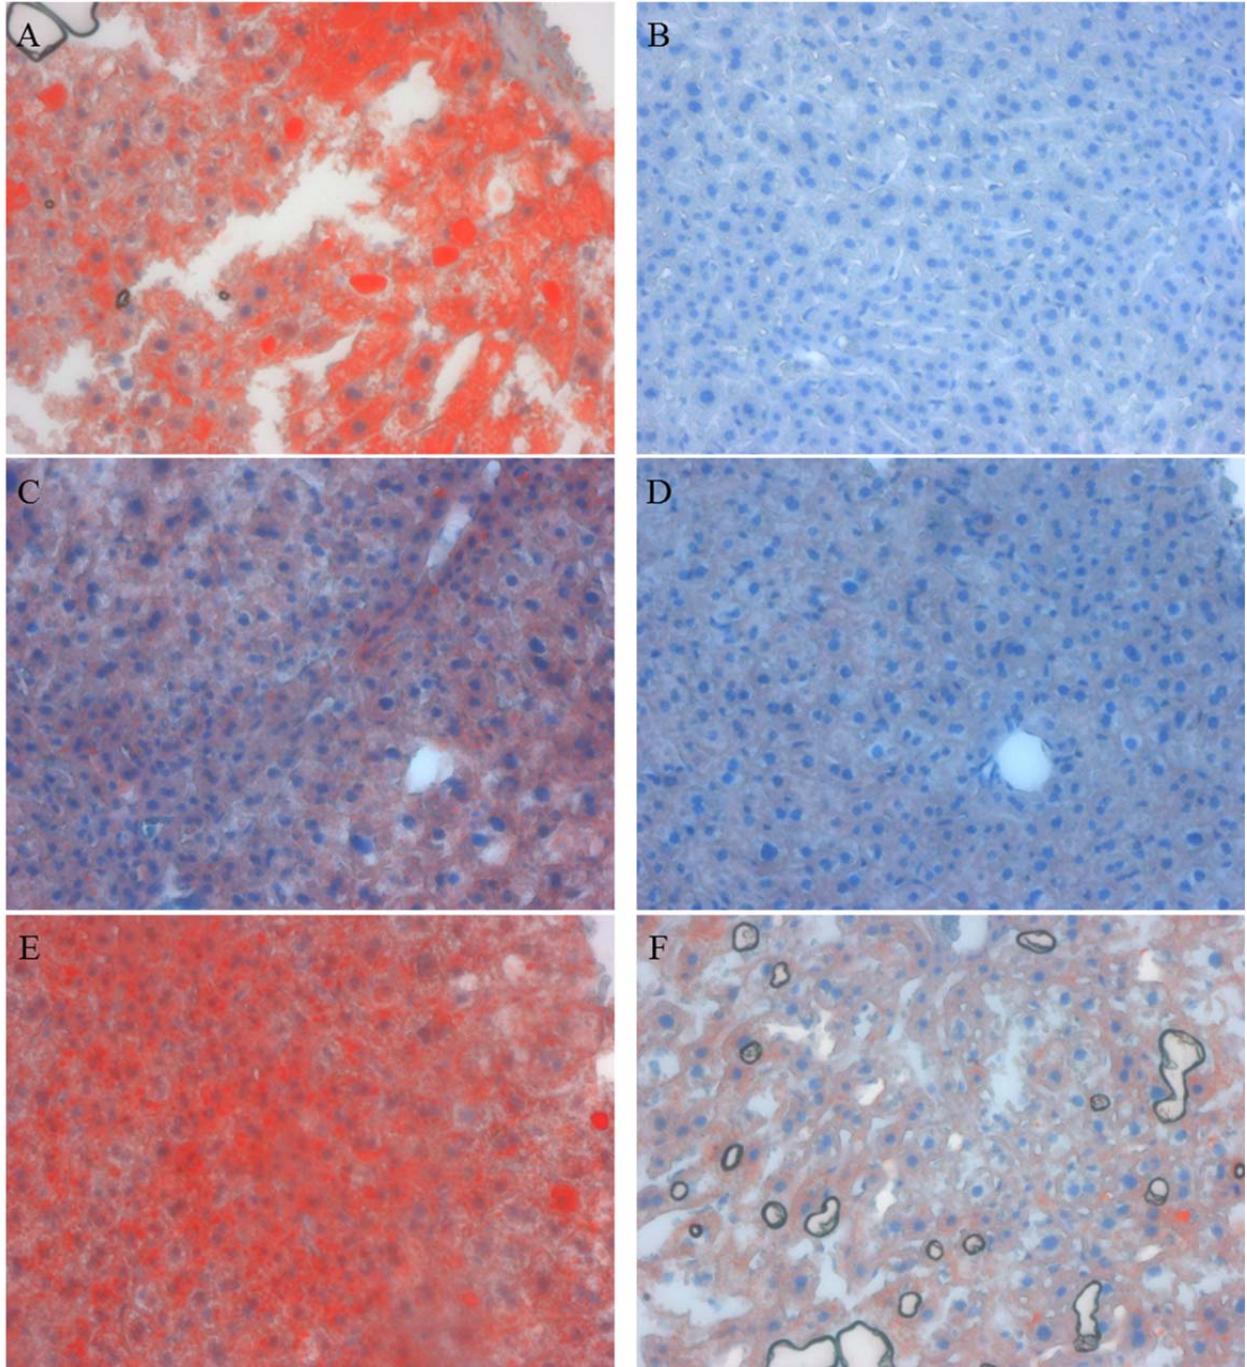

35
